# Supplementary material for: MOSES: A New Approach to Integrate Interactome Topology and Functional Features for Disease Gene Prediction
Source: MDPI journal article supplement (doi:10.3390/genes12111713), 2021-10-27
Supplement: s1 [file s1]

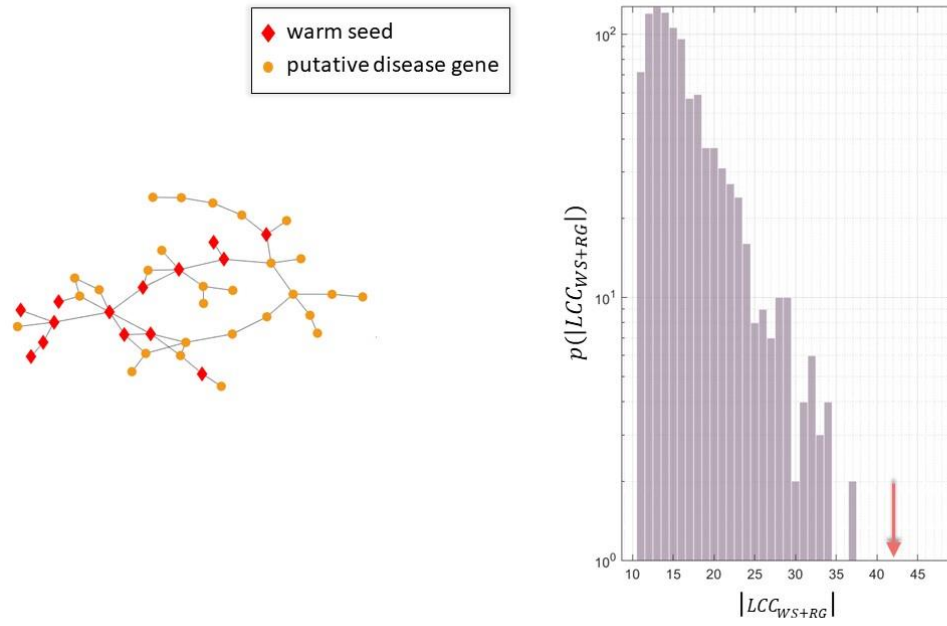

**Figure S1.** Largest connected component ( $LCC$ ) of the predicted disease module (*warm seeds* and putative disease genes) for *amino acid metabolism inborn errors*. Node shape codes for the type of genes: red diamonds represent the *warm seeds* (14 nodes), while orange dots represent the putative disease genes (28 nodes). On the right, distribution of the size of the 1000  $LCC$ s of the random disease modules ( $|LCC_{WS+RG}|$ ) obtained adding to the *warm seeds*, a set of randomly selected genes with cardinality equal to the set of putative genes; the orange arrow indicates the size of the  $LCC_{WS+PG}$  shown in the left panel.

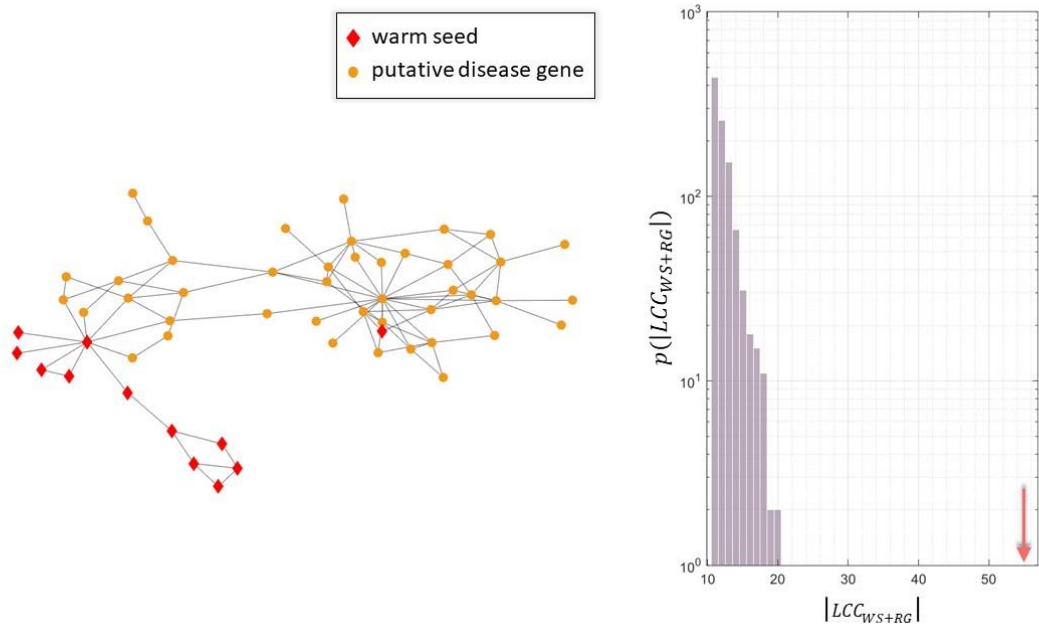

**Figure S2.** Largest connected component (*LCC*) of the predicted disease module (*warm seeds* and putative disease genes) for *anemia*, *hemolytic*. Node shape codes for the type of genes: red diamonds represent the *warm seeds* (12 nodes), while orange dots represent the putative disease genes (43 nodes). On the right, distribution of the size of the 1000 *LCCs* of the random disease modules ( $|LCC_{WS+RG}|$ ) obtained adding to the *warm seeds*, a set of randomly selected genes with cardinality equal to the set of putative genes; the orange arrow indicates the size of the  $LCC_{WS+PG}$  shown in the left panel.

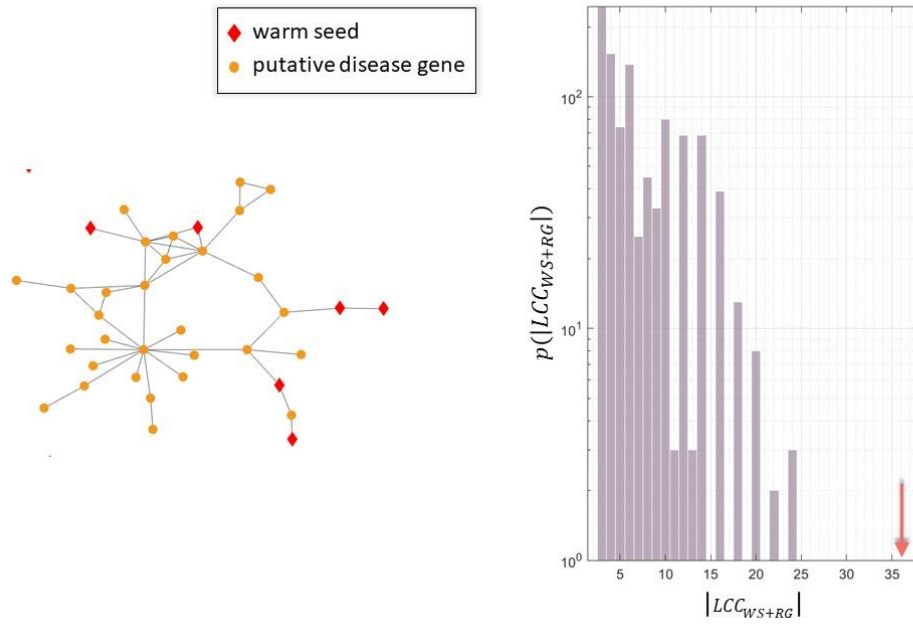

**Figure S3.** Largest connected component ( $LCC$ ) of the predicted disease module (*warm seeds* and putative disease genes) for *arrhythmias, cardiac*. Node shape codes for the type of genes: red diamonds represent the *warm seeds* (6 nodes), while orange dots represent the putative disease genes (30 nodes). On the right, distribution of the size of the 1000  $LCC$ s of the random disease modules ( $|LCC_{WS+RG}|$ ) obtained adding to the *warm seeds*, a set of randomly selected genes with cardinality equal to the set of putative genes; the orange arrow indicates the size of the  $LCC_{WS+PG}$  shown in the left panel.

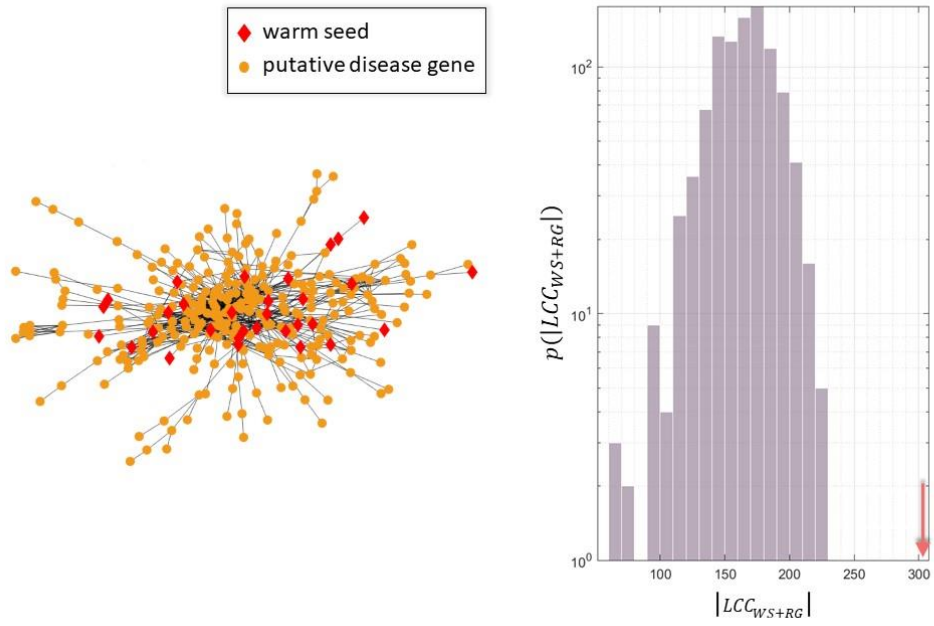

**Figure S4.** Largest connected component ( $LCC$ ) of the predicted disease module (*warm seeds* and putative disease genes) for *arthritis, rheumatoid*. Node shape codes for the type of genes: red diamonds represent the *warm seeds* (31 nodes), while orange dots represent the putative disease genes (275 nodes). On the right, distribution of the size of the 1000  $LCC$ s of the random disease modules ( $|LCC_{WS+RG}|$ ) obtained adding to the *warm seeds*, a set of randomly selected genes with cardinality equal to the set of putative genes; the orange arrow indicates the size of the  $LCC_{WS+PG}$  shown in the left panel.

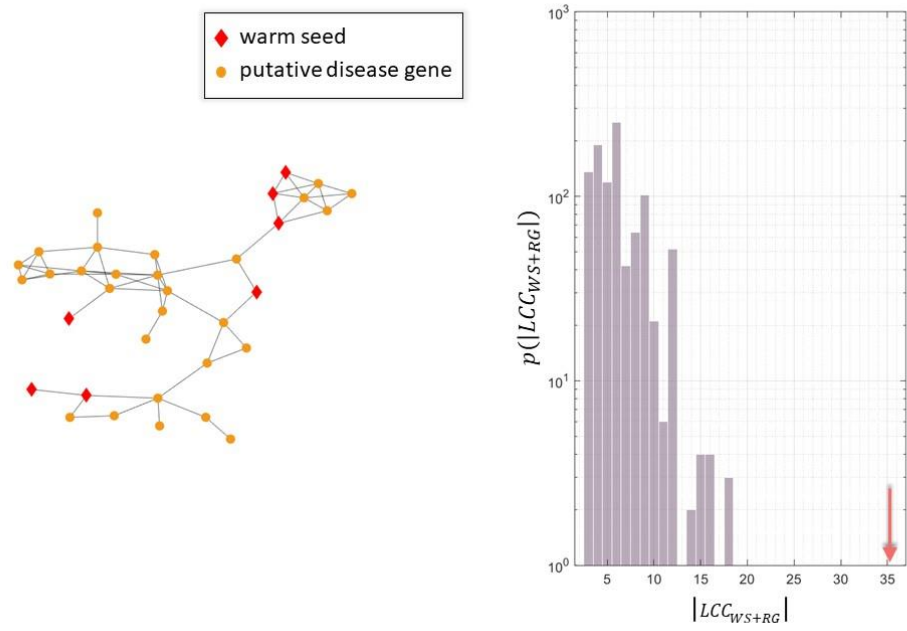

**Figure S5.** Largest connected component (*LCC*) of the predicted disease module (*warm seeds* and putative disease genes) for *bile duct diseases*. Node shape codes for the type of genes: red diamonds represent the *warm seeds* (7 nodes), while orange dots represent the putative disease genes (28 nodes). On the right, distribution of the size of the 1000 *LCCs* of the random disease modules ( $|LCC_{WS+RG}|$ ) obtained adding to the *warm seeds*, a set of randomly selected genes with cardinality equal to the set of putative genes; the orange arrow indicates the size of the  $LCC_{WS+PG}$  shown in the left panel.

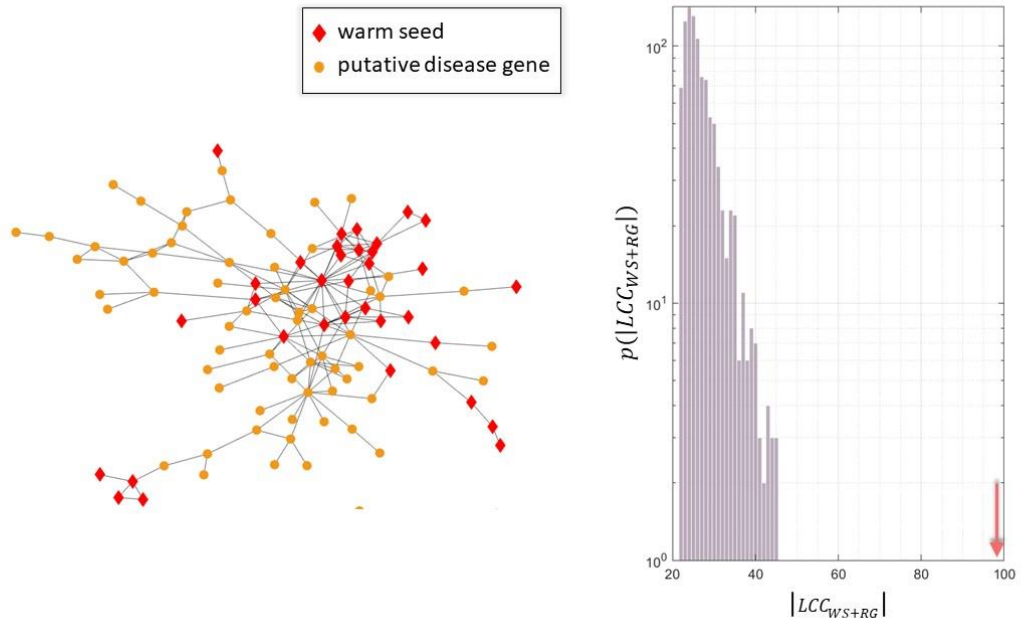

**Figure S6.** Largest connected component ( $LCC$ ) of the predicted disease module (*warm seeds* and putative disease genes) for *blood coagulation disorders*. Node shape codes for the type of genes: red diamonds represent the *warm seeds* (34 nodes), while orange dots represent the putative disease genes (64 nodes). On the right, distribution of the size of the 1000  $LCC$ s of the random disease modules ( $|LCC_{WS+RG}|$ ) obtained adding to the *warm seeds*, a set of randomly selected genes with cardinality equal to the set of putative genes; the orange arrow indicates the size of the  $LCC_{WS+PG}$  shown in the left panel.

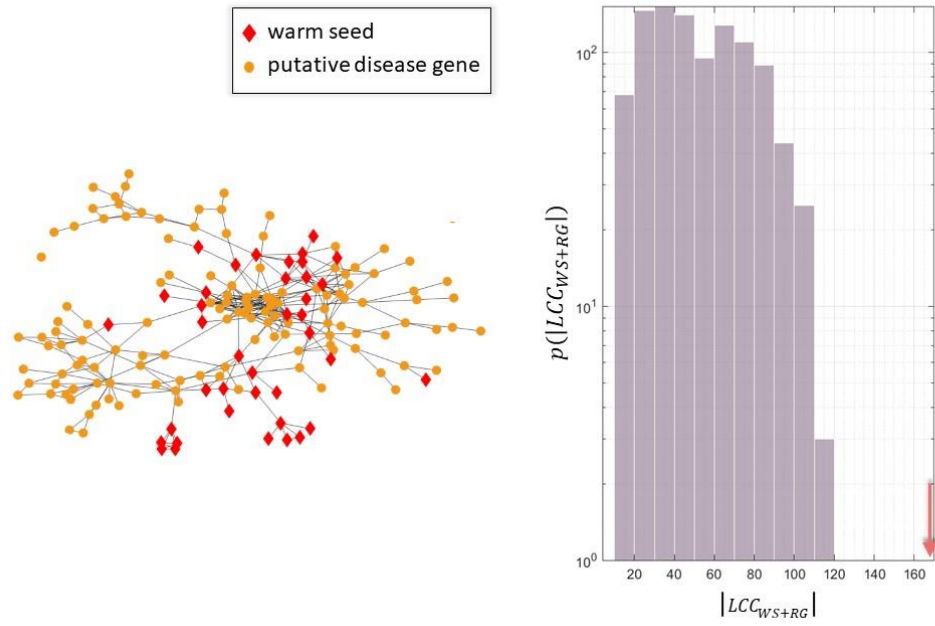

**Figure S7.** Largest connected component ( $LCC$ ) of the predicted disease module (*warm seeds* and putative disease genes) for *carbohydrate metabolism inborn errors*. Node shape codes for the type of genes: red diamonds represent the *warm seeds* (39 nodes), while orange dots represent the putative disease genes (129 nodes). On the right, distribution of the size of the 1000  $LCC$ s of the random disease modules ( $|LCC_{WS+RG}|$ ) obtained adding to the *warm seeds*, a set of randomly selected genes with cardinality equal to the set of putative genes; the orange arrow indicates the size of the  $LCC_{WS+PG}$  shown in the left panel.

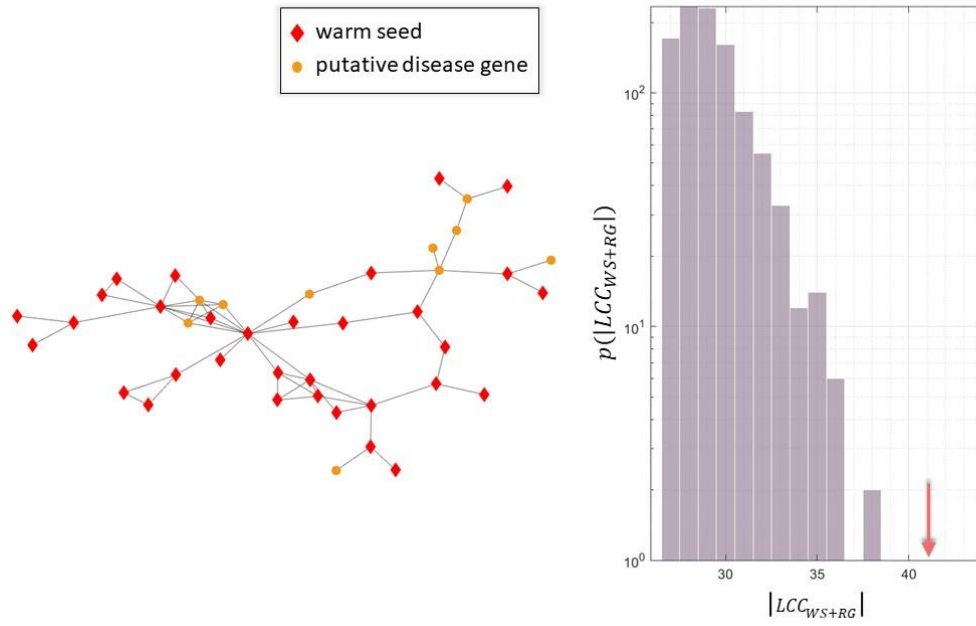

**Figure S8.** Largest connected component ( $LCC$ ) of the predicted disease module (*warm seeds* and putative disease genes) for *cardiomyopathies*. Node shape codes for the type of genes: red diamonds represent the *warm seeds* (32 nodes), while orange dots represent the putative disease genes (10 nodes). On the right, distribution of the size of the 1000  $LCC$ s of the random disease modules ( $|LCC_{WS+RG}|$ ) obtained adding to the *warm seeds*, a set of randomly selected genes with cardinality equal to the set of putative genes; the orange arrow indicates the size of the  $LCC_{WS+PG}$  shown in the left panel.



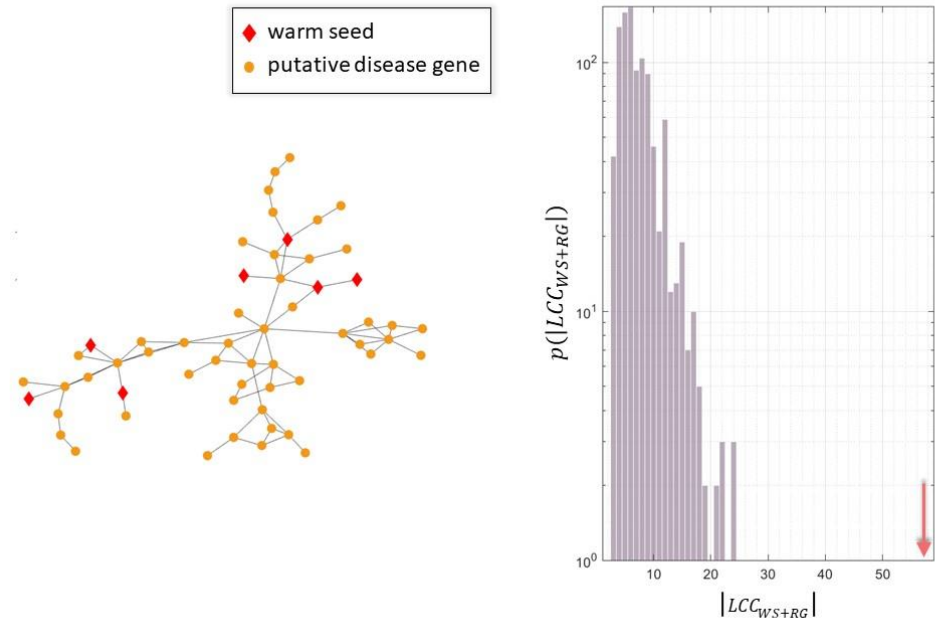

**Figure S9.** Largest connected component ( $LCC$ ) of the predicted disease module (*warm seeds* and putative disease genes) for *celiac disease*. Node shape codes for the type of genes: red diamonds represent the *warm seeds* (7 nodes), while orange dots represent the putative disease genes (50 nodes). On the right, distribution of the size of the 1000  $LCC$ s of the random disease modules ( $|LCC_{WS+RG}|$ ) obtained adding to the *warm seeds*, a set of randomly selected genes with cardinality equal to the set of putative genes; the orange arrow indicates the size of the  $LCC_{WS+PG}$  shown in the left panel.

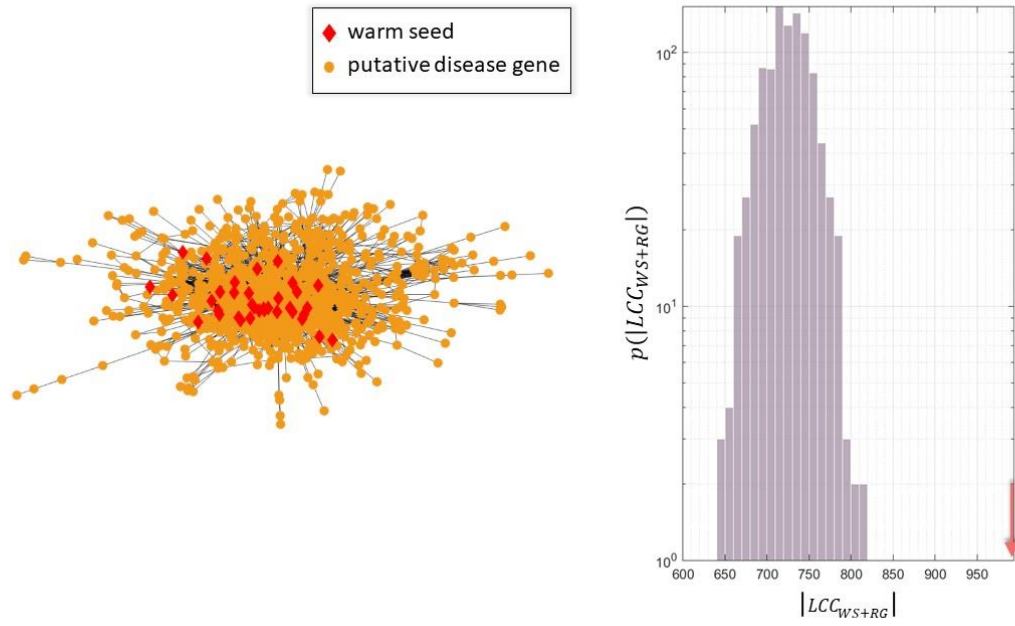

**Figure S10.** Largest connected component ( $LCC$ ) of the predicted disease module (*warm seeds* and putative disease genes) for *colorectal neoplasms*. Node shape codes for the type of genes: red diamonds represent the *warm seeds* (35 nodes), while orange dots represent the putative disease genes (957 nodes). On the right, distribution of the size of the 1000  $LCC$ s of the random disease modules ( $|LCC_{WS+RG}|$ ) obtained adding to the *warm seeds*, a set of randomly selected genes with cardinality equal to the set of putative genes; the orange arrow indicates the size of the  $LCC_{WS+PG}$  shown in the left panel.

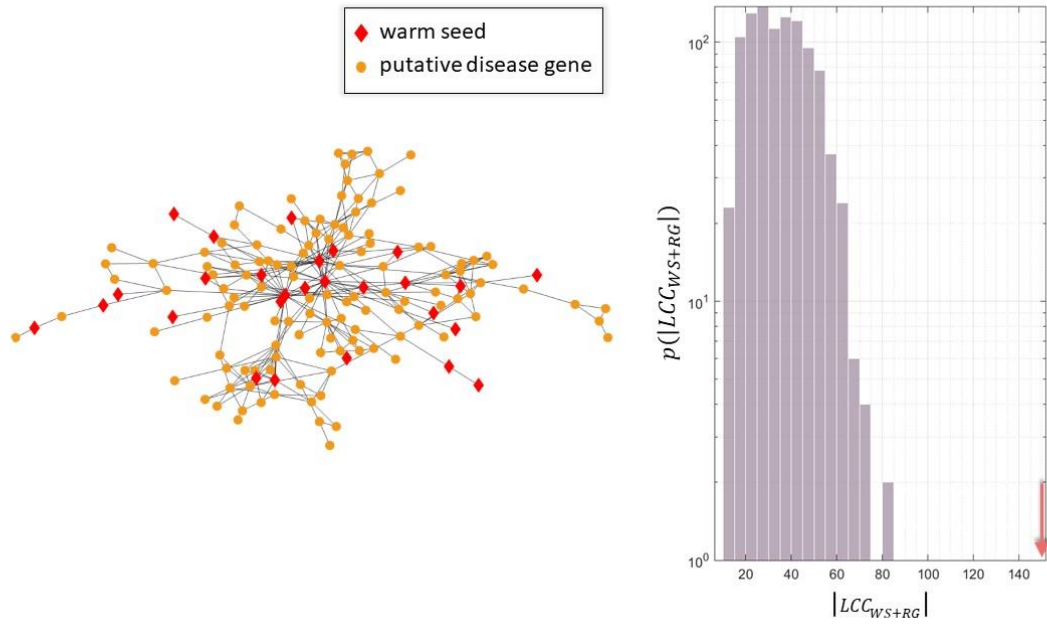

**Figure S11.** Largest connected component ( $LCC$ ) of the predicted disease module (*warm seeds* and putative disease genes) for *crohn disease*. Node shape codes for the type of genes: red diamonds represent the *warm seeds* (27 nodes), while orange dots represent the putative disease genes (123 nodes). On the right, distribution of the size of the 1000  $LCC$ s of the random disease modules ( $|LCC_{WS+RG}|$ ) obtained adding to the *warm seeds*, a set of randomly selected genes with cardinality equal to the set of putative genes; the orange arrow indicates the size of the  $LCC_{WS+PG}$  shown in the left panel.

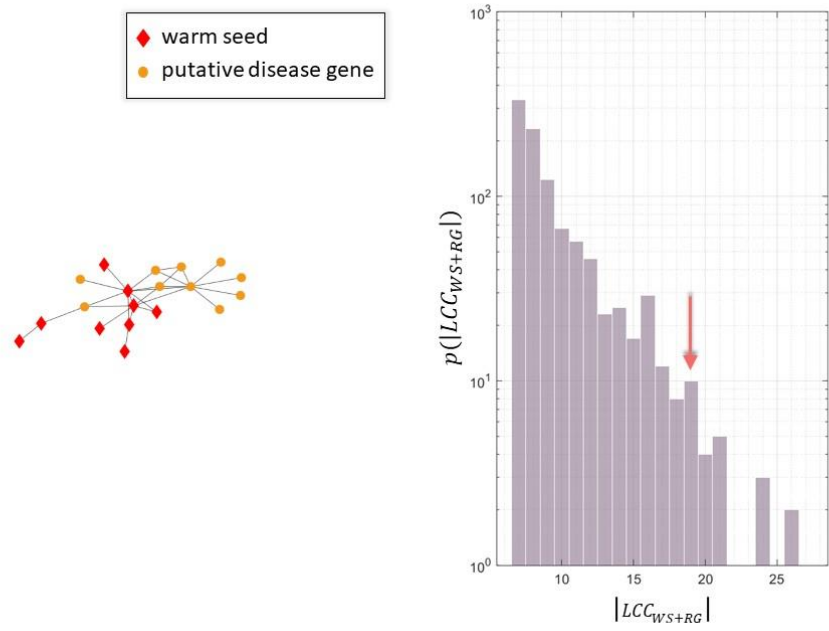

**Figure S12.** Largest connected component ( $LCC$ ) of the predicted disease module (*warm seeds* and putative disease genes) for *diabetes mellitus type 2*. Node shape codes for the type of genes: red diamonds represent the *warm seeds* (9 nodes), while orange dots represent the putative disease genes (10 nodes). On the right, distribution of the size of the 1000  $LCC$ s of the random disease modules ( $|LCC_{WS+RG}|$ ) obtained adding to the *warm seeds*, a set of randomly selected genes with cardinality equal to the set of putative genes; the orange arrow indicates the size of the  $LCC_{WS+PG}$  shown in the left panel.

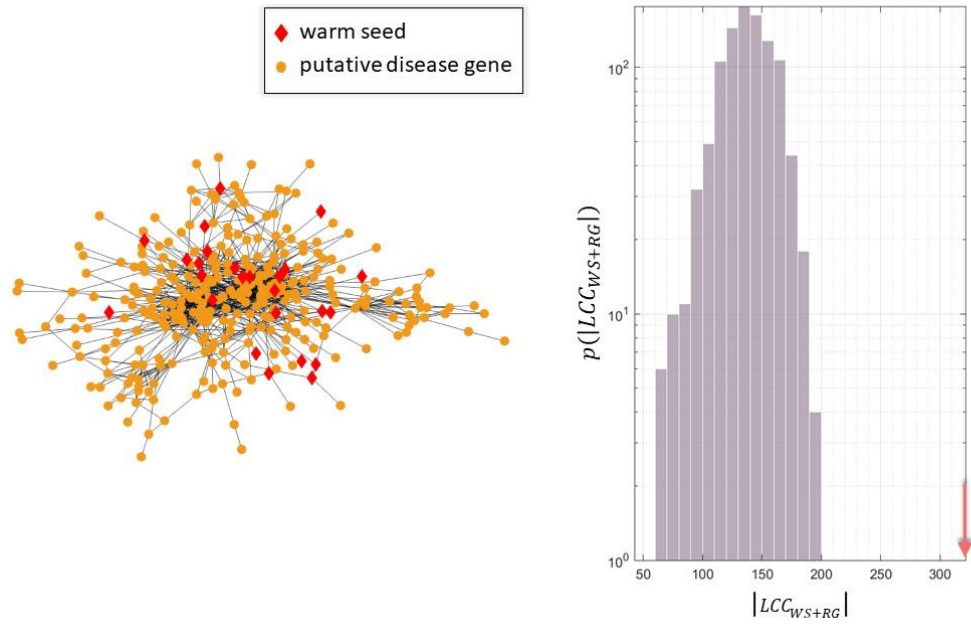

**Figure S13.** Largest connected component ( $LCC$ ) of the predicted disease module (*warm seeds* and putative disease genes) for *head and neck neoplasms*. Node shape codes for the type of genes: red diamonds represent the *warm seeds* (25 nodes), while orange dots represent the putative disease genes (295 nodes). On the right, distribution of the size of the 1000  $LCC$ s of the random disease modules ( $|LCC_{WS+RG}|$ ) obtained adding to the *warm seeds*, a set of randomly selected genes with cardinality equal to the set of putative genes; the orange arrow indicates the size of the  $LCC_{WS+PG}$  shown in the left panel.

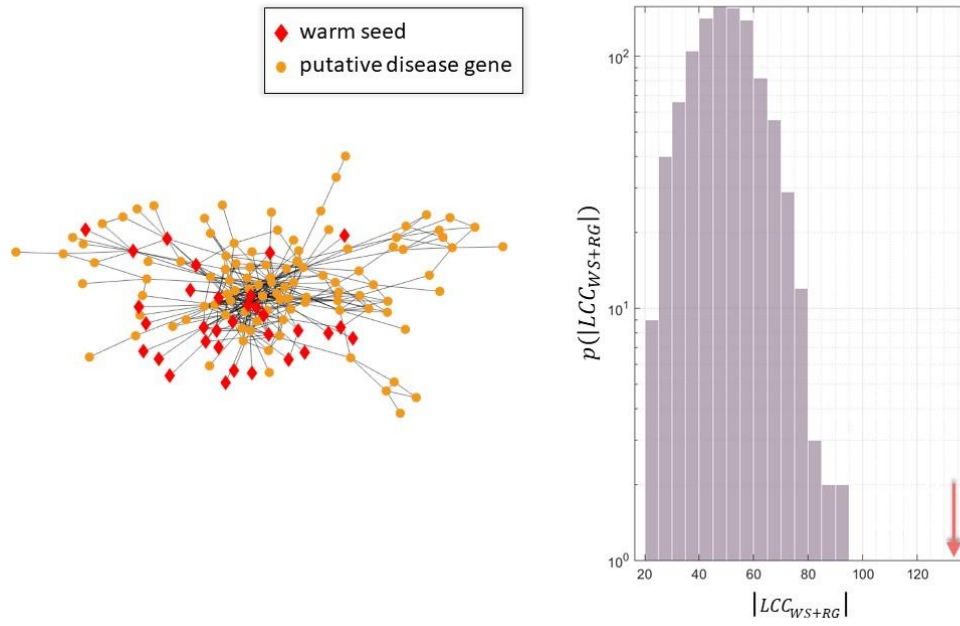

**Figure S14.** Largest connected component ( $LCC$ ) of the predicted disease module (*warm seeds* and putative disease genes) for *leukemia, myeloid*. Node shape codes for the type of genes: red diamonds represent the *warm seeds* (32 nodes), while orange dots represent the putative disease genes (104 nodes). On the right, distribution of the size of the 1000  $LCC$ s of the random disease modules ( $|LCC_{WS+RG}|$ ) obtained adding to the *warm seeds*, a set of randomly selected genes with cardinality equal to the set of putative genes; the orange arrow indicates the size of the  $LCC_{WS+PG}$  shown in the left panel.

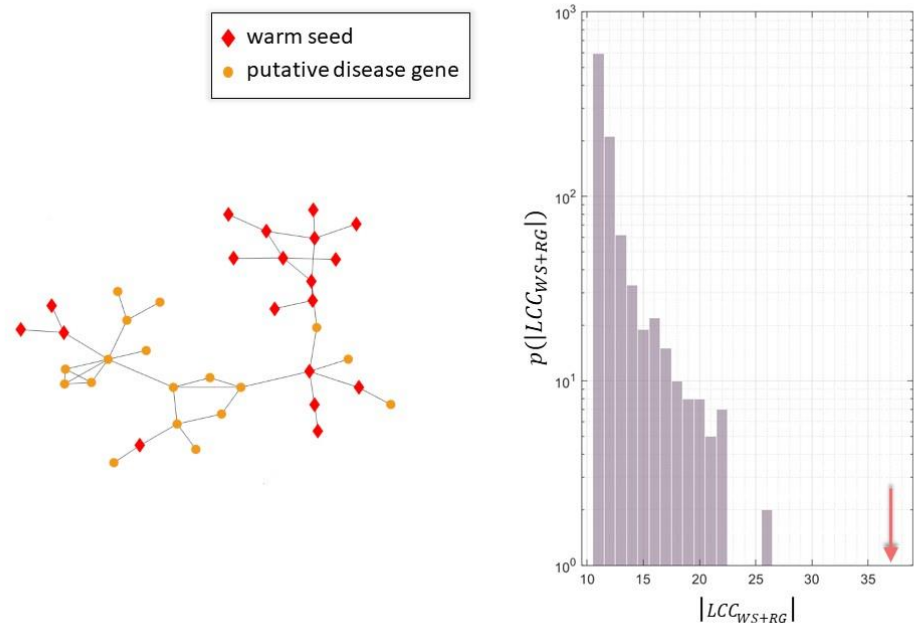

**Figure S15.** Largest connected component ( $LCC$ ) of the predicted disease module (*warm seeds* and putative disease genes) for *lipid metabolism disorders*. Node shape codes for the type of genes: red diamonds represent the *warm seeds* (19 nodes), while orange dots represent the putative disease genes (18 nodes). On the right, distribution of the size of the 1000  $LCC$ s of the random disease modules ( $|LCC_{WS+RG}|$ ) obtained adding to the *warm seeds*, a set of randomly selected genes with cardinality equal to the set of putative genes; the orange arrow indicates the size of the  $LCC_{WS+PG}$  shown in the left panel.

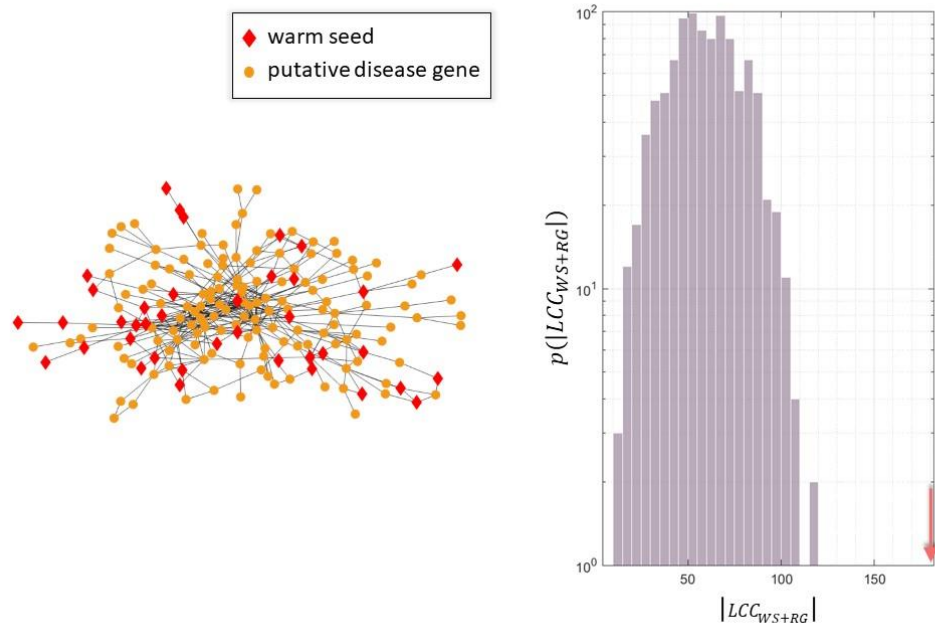

**Figure S16.** Largest connected component ( $LCC$ ) of the predicted disease module (*warm seeds* and putative disease genes) for *lupus erythematosus*. Node shape codes for the type of genes: red diamonds represent the *warm seeds* (39 nodes), while orange dots represent the putative disease genes (141 nodes). On the right, distribution of the size of the 1000  $LCC$ s of the random disease modules ( $|LCC_{WS+RG}|$ ) obtained adding to the *warm seeds*, a set of randomly selected genes with cardinality equal to the set of putative genes; the orange arrow indicates the size of the  $LCC_{WS+PG}$  shown in the left panel.



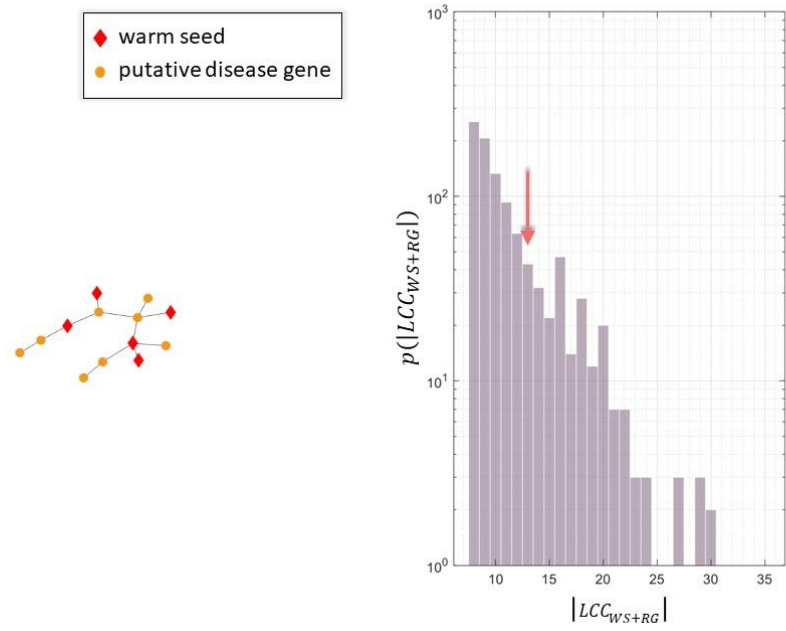

**Figure S17.** Largest connected component ( $LCC$ ) of the predicted disease module (*warm seeds* and putative disease genes) for *lysosomal storage diseases*. Node shape codes for the type of genes: red diamonds represent the *warm seeds* (5 nodes), while orange dots represent the putative disease genes (8 nodes). On the right, distribution of the size of the 1000  $LCC$ s of the random disease modules ( $|LCC_{WS+RG}|$ ) obtained adding to the *warm seeds*, a set of randomly selected genes with cardinality equal to the set of putative genes; the orange arrow indicates the size of the  $LCC_{WS+PG}$  shown in the left panel.

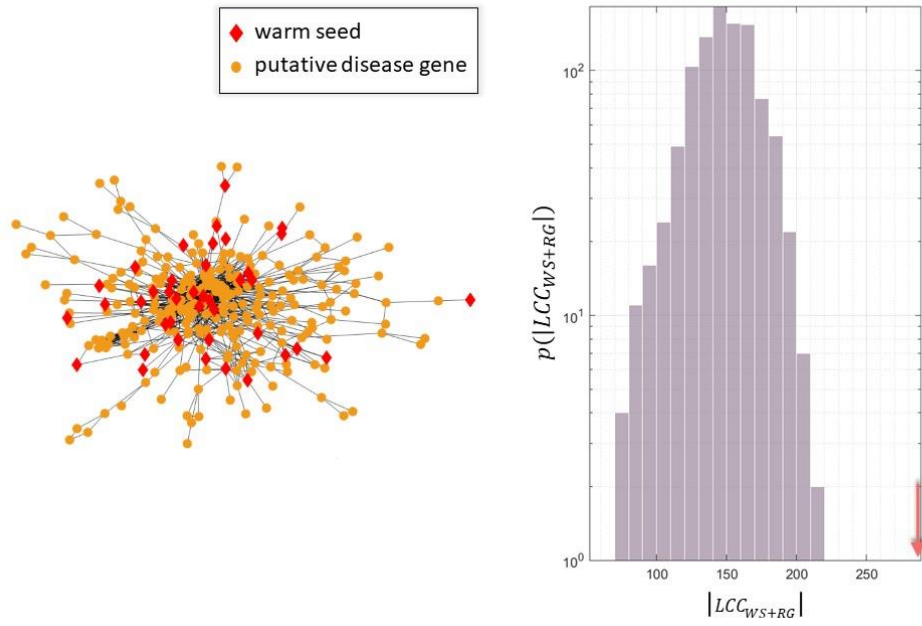

**Figure S18.** Largest connected component ( $LCC$ ) of the predicted disease module (*warm seeds* and putative disease genes) for *multiple sclerosis*. Node shape codes for the type of genes: red diamonds represent the *warm seeds* (40 nodes), while orange dots represent the putative disease genes (247 nodes). On the right, distribution of the size of the 1000  $LCC$ s of the random disease modules ( $|LCC_{WS+RG}|$ ) obtained adding to the *warm seeds*, a set of randomly selected genes with cardinality equal to the set of putative genes; the orange arrow indicates the size of the  $LCC_{WS+PG}$  shown in the left panel.

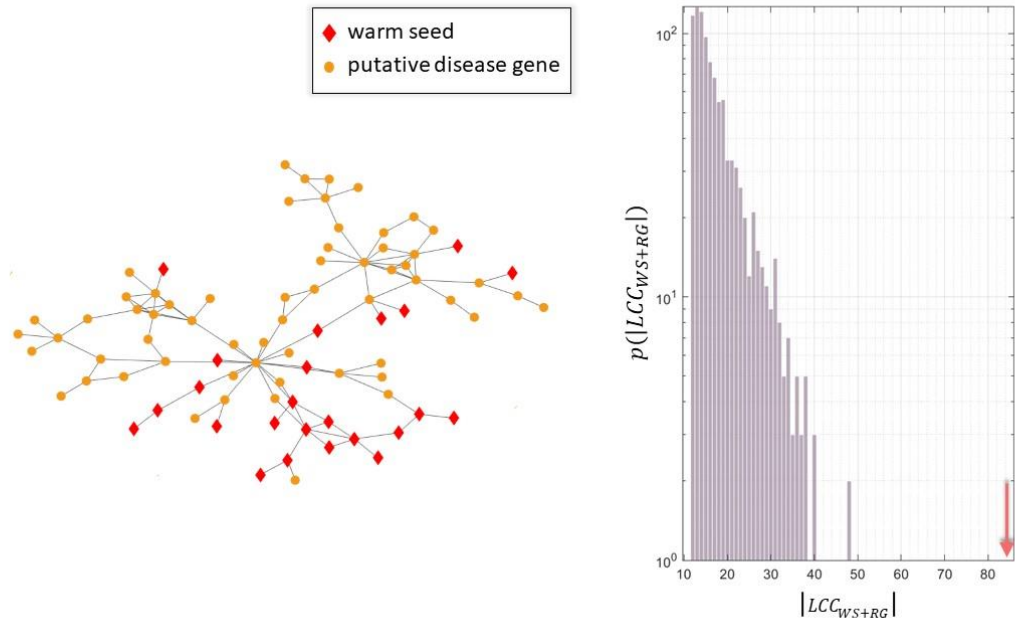

**Figure S19.** Largest connected component ( $LCC$ ) of the predicted disease module (*warm seeds* and putative disease genes) for *muscular dystrophies*. Node shape codes for the type of genes: red diamonds represent the *warm seeds* (24 nodes), while orange dots represent the putative disease genes (60 nodes). On the right, distribution of the size of the 1000  $LCC$ s of the random disease modules ( $|LCC_{WS+RG}|$ ) obtained adding to the *warm seeds*, a set of randomly selected genes with cardinality equal to the set of putative genes; the orange arrow indicates the size of the  $LCC_{WS+PG}$  shown in the left panel.

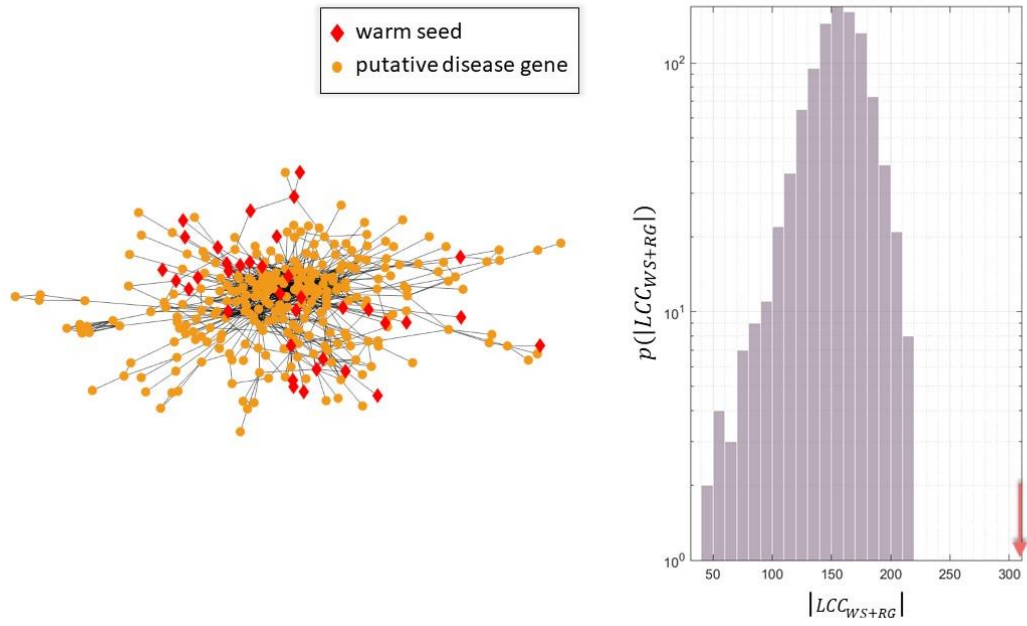

**Figure S20.** Largest connected component ( $LCC$ ) of the predicted disease module (*warm seeds* and putative disease genes) for *psoriasis*. Node shape codes for the type of genes: red diamonds represent the *warm seeds* (36 nodes), while orange dots represent the putative disease genes (273 nodes). On the right, distribution of the size of the 1000  $LCC$ s of the random disease modules ( $|LCC_{WS+RG}|$ ) obtained adding to the *warm seeds*, a set of randomly selected genes with cardinality equal to the set of putative genes; the orange arrow indicates the size of the  $LCC_{WS+PG}$  shown in the left panel.

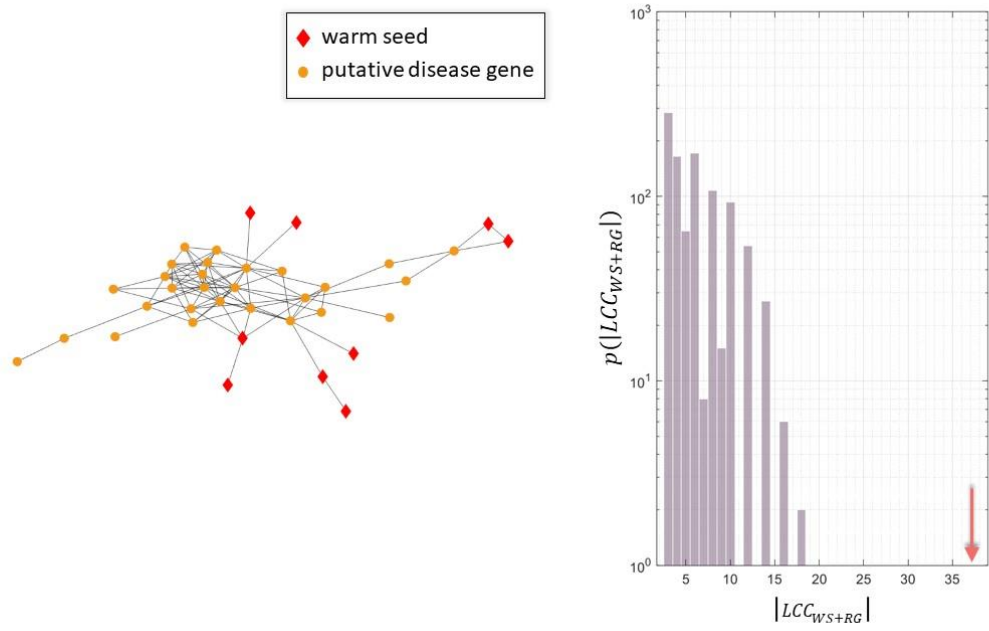

**Figure S21.** Largest connected component ( $LCC$ ) of the predicted disease module (*warm seeds* and putative disease genes) for *spinocerebellar degenerations*. Node shape codes for the type of genes: red diamonds represent the *warm seeds* (9 nodes), while orange dots represent the putative disease genes (28 nodes). On the right, distribution of the size of the 1000  $LCC$ s of the random disease modules ( $|LCC_{WS+RG}|$ ) obtained adding to the *warm seeds*, a set of randomly selected genes with cardinality equal to the set of putative genes; the orange arrow indicates the size of the  $LCC_{WS+PG}$  shown in the left panel.
