# Supplementary material for: MOSES: A New Approach to Integrate Interactome Topology and Functional Features for Disease Gene Prediction
Source: Genes (Basel). 2021 Oct 27;12(11):1713. doi: 10.3390/genes12111713 (PMC8624742; doi:10.3390/genes12111713)
Supplement: Supplementary file 1 [file genes-12-01713-s001.zip]

Archive with 5 entries (3 files):
- genes-1413627-supplementary/
- genes-1413627-supplementary/genes-1413627supplementary.v1/
- genes-1413627-supplementary/genes-1413627supplementary.v1/Figure S1-21.pdf
- genes-1413627-supplementary/genes-1413627supplementary.v1/Table S1.xlsx
- genes-1413627-supplementary/genes-1413627supplementary.v1/Table S2.xlsx
