# Supplementary material for: MOSES: A New Approach to Integrate Interactome Topology and Functional Features for Disease Gene Prediction
Source: Genes (Basel). 2021 Oct 27;12(11):1713. doi: 10.3390/genes12111713 (PMC8624742; doi:10.3390/genes12111713)
Supplement: Supplementary file 1 [file genes-12-01713-s001.zip › genes-1413627-supplementary/genes-1413627supplementary.v1/Table S1.xlsx]

## Sheet: Rheumatoid arthritis 
Table S1. disease genes and putative genes for rheumatoid arthritis
Disease genes	Putative disease genes
CD40	LCK
IRF5	JUN
IL6	MAPK14
NOTCH4	NFKBIB
TRAF1	PTPRC
TNFAIP3	EP300
RBPJ	PDCD1
CTLA4	CD2
AIRE	ITGA4
MIF	GRB2
HSPA5	NR3C1
REL	CREBBP
PFKL	ABL1
HLA-DRB1	TRAF6
HLA-DQA1	TLR3
FAM107A	DRD2
BLK	FYN
OLIG3	KIR2DL4
MACIR	ARRB2
FAM167A	HSP90AB1
NFKBIL1	TBXA2R
MICB	JAK2
TNPO3	SNW1
SPRED2	OPRM1
PHF19	IRAK1
HLA-DRB5	NOS2
ANKRD55	PTPN11
CCL21	MAPK1
APOM	FADD
RSBN1	GNB1
HLA-G	HDAC1
FCRL3	PSME3
PTPN22	B2M
IL2RA	CASP8
PADI4	TLR4
HLA-DQB1	F2
HLA-DQA2	MAP3K7
CCR6	CBLB
STAT4	SDC4
SLC22A4	CAMK2A
LONRF2	PVR
AFF3	CBL
	CXADR
	PSEN1
	KIR2DL3
	IRF7
	GP1BA
	JAK1
	MAPK3
	CYP11A1
	PRKCB
	MAPK8
	ADA
	TAB2
	CD28
	DLD
	PTPN6
	PTH1R
	TFRC
	KLRC2
	HES1
	RIPK1
	FSHR
	CCKBR
	NOTCH3
	HLA-DRA
	PDE2A
	NCF2
	POLR3C
	KAT2A
	HSPD1
	STAT1
	ITGB1
	C1R
	TYK2
	PIK3CA
	CD74
	PIK3R1
	ACTN2
	CYP2E1
	CBLC
	CD3E
	NOTCH2
	DRD4
	AGTR1
	LHCGR
	RAG1
	JAG1
	PDE4D
	MAP2K1
	TRPV1
	CIITA
	NOTCH1
	GRIK3
	JAG2
	AGTR2
	TRIM21
	HLA-DMA
	ADRB2
	ICAM1
	MAP3K8
	PRF1
	KIR2DL1
	ADH6
	DRD1
	GP1BB
	ITGA2
	CD8A
	GRIN1
	ICAM2
	POLR3F
	POLR3G
	CAV1
	CD3D
	BTK
	ALDH2
	IRF3
	CD14
	STAT5B
	TSHR
	IKBKE
	FTH1
	DTX1
	CD80
	KLRC1
	HTR2C
	HTR2B
	HTR6
	NPY1R
	C8A
	ELANE
	OPRD1
	GIPR
	IRAK4
	MGST1
	CD4
	CD86
	ITGA5
	PTGER4
	PRKG1
	CD99
	LBP
	HLA-A
	CAMK2G
	CALCRL
	PIK3R2
	FCGR3A
	TLR2
	STAT2
	GRIA1
	NCF4
	HLA-C
	TSPO
	ADRA2A
	FCGR3B
	APRT
	OPRK1
	SPRY2
	HLA-DOA
	ITGB7
	P2RY1
	AKR1C3
	SULT2B1
	COMT
	SULT1E1
	NME5
	NCF1
	HPRT1
	PSME1
	CTSG
	GSTP1
	IFI30
	GLP1R
	NMUR2
	P2RY6
	GSTA2
	AKR1C1
	HTR1E
	ACSS1
	CD33
	HMOX1
	MS4A1
	CDA
	CD79A
	CYP1A1
	PTH2R
	DTX3L
	CES1
	AKR1B1
	POLR3A
	POLR3B
	POLR3D
	CANX
	POLR3H
	PSME2
	GSTO1
	GPI
	SOD1
	CD1A
	MGST3
	ALDH1B1
	PNP
	PNPT1
	CD44
	SPN
	RDH5
	OR7C1
	OR5F1
	OR51E2
	OR2S2
	OR2K2
	OR10H3
	NAT2
	NAT1
	LPAR1
	LGMN
	LFNG
	KIR3DL1
	ICOS
	HLA-F
	HLA-E
	HLA-DRB3
	HLA-DPB1
	HLA-DPA1
	HLA-DMB
	HLA-B
	GLRA2
	CYP2C18
	CD274
	CD1B
	CD19
	CANT1
	AKR1C2
	ADH1C
	PDE3A
	MC1R
	CPE
	ADH5
	GOT2
	UMPS
	CHRNB1
	ICAM3
	PLA2G2A
	MAP3K14
	PIK3CB
	GSTO2
	MAP2K7
	EPHX1
	POLR3K
	ACSS2
	ZAP70
	CAMK2D
	CAMK2B
	UGT1A9
	TLR1
	CYP3A5
	CYP2C9
	CHRM3
	MADCAM1
	VIPR2
	KIR3DL2
	FPR2
	CD1E
	C9
	IRF9
	ALDH3A1
	VCAM1
	NPY2R
	CD36
	CHRNA3
	STS
	GRPR
	CYP1A2
	FCGR1A
	CYP2B6
	CHRM4
	ICOSLG
	OR52W1
	VIPR1
	AOC2
	S1PR4
	EDNRB
	CYP19A1
	C8G
	CYP7B1
	CD7
	CD22
	RPE65
	FMO2
	CYP2A6
	CHRM1
	CNR1
	HTR1F
	MAML1
	KAT2B
	TAPBP
	CHRM2
	ADRA1A
	SELL
	HTR2A
	NMBR
	CCKAR
	CLDN4
	HCRTR1
	CTSS
	GZMA
	TLR8
	HSD11B2
	CD34
	CYP3A4
	DLL1
	PDE8A
	F2RL3
	HES5
	KLRC3
	KIR2DS3
	MFNG
	RFNG
	CR2
	NCAM1
	CHRNA1
	TLR6
	GLRB
	FPR1
	RAG2
	NPR1
	MAML3
	MAML2
	CHRNA4
	THPO
	CR1
	CD3G
	NPR2
	CD226
	GCGR
	PLA2G5
	C5AR1
	FSHB
	GALR2
	GHRHR
	GRM6
	CYP17A1
	CD59
	C1QC
	CYSLTR2
	ADRA2B
	CHRNB2
	CD8B
	OR1G1
	GUCY2F
	FMO3
	FMO1
	NPFFR2
	ADCYAP1R1
	MGST2
	CRHR2
	GNG13
	IGLL1
	GLRA1
	SPRED1
	DRD5
	GSTA4
	OR7D4
	OR10AG1
	OR5AS1
	ADRA2C
	OR7A17
	OR2G6
	PDCD1LG2
	OR52E6
	CYP21A2
	OR2AG1
	CD38
	NTSR1
	TLR7
	KLRD1
	CD1D
	CRHR1
	PIK3R5
	HLA-DOB
	CYP1B1
	OR10J1
	OR4S2
	DHRS4
	ENPP1
	CD276
	OR6C70
	KIR2DS5
	KIR2DS1
	FCGR2C
	CYP2J2
	ADH1B
	AICDA
	PDE4B
	PDE5A
	CHRNA7
	LTB4R
	CYP3A7
	CYP2C19
	CYP2A13
	CES2
	UGT2B15
	ADH7
	ALDH1A1
	SCTR
	AVPR1A
	P2RY2
	CALCR
	ADH1A
	ADH4
	DLL4
	HTR4
	P2RY4
	NTSR2
	NMUR1
	GHSR
	GLP2R
	HRH4
	NPFFR1
	NPY5R
	SSTR4
	MC3R
	PRLHR
	ADCY10
	MC2R
	HCRTR2
	OXTR
	MCHR1
	TACR3
	C7
	CYSLTR1
	KIR2DL2
	C8B
	CYP11B2
	CNGB1
	OR10G4
	OR7C2
	OR51E1
	OR6B1
	OR5K2
	UGT2B11
	OR7D2
	OR1L3
	OR6C1
	OR52L1
	OR14I1
	OR4F16
