# Supplementary material for: MOSES: A New Approach to Integrate Interactome Topology and Functional Features for Disease Gene Prediction
Source: Genes (Basel). 2021 Oct 27;12(11):1713. doi: 10.3390/genes12111713 (PMC8624742; doi:10.3390/genes12111713)
Supplement: Supplementary file 1 [file genes-12-01713-s001.zip › genes-1413627-supplementary/genes-1413627supplementary.v1/Table S2.xlsx]

## Sheet: Colorectal neoplasms
Table S2. disease genes and putative genes for colorectal cancer
Disease genes	Putative disease genes
APC	NFKB1
BRAF	PLCG1
SMAD4	PPARG
SMAD3	DVL1
AKT1	FGF7
SMAD7	TH
MSH2	TRAF2
CTNNB1	ETS1
EPHA3	MAPK14
RUNX1T1	POLD2
MLH1	ENO1
TGFBR2	AR
BMPR1A	DAXX
MSH6	BCR
BMP2	PRKAA2
ATF1	GAB1
PIK3CA	ILK
CDH1	HSP90AA1
RET	CACNA1A
TRPS1	MDM2
NF1	CCNA1
BMP4	FLNA
GNAS	EP300
EIF3H	ACTN4
WRN	GSK3B
AXIN2	IL2RG
MUTYH	EPOR
SCG5	LEF1
MTHFD1	FOS
PMS2	RPA2
MAP2K3	IKBKG
DUSP10	PRKACB
LAMA5	BCL2L1
MT-CO1	NR3C1
MYNN	CREBBP
GREM1	SMAD2
MLH3	MYC
RHPN2	SCNN1B
GALNT12	TNFRSF6B
DIP2B	GHR
EPCAM	CSNK2A1
SLC22A3	CSNK2A2
	RXRA
	CD40
	DRD2
	DRD3
	IL12B
	PPP2CA
	MEF2C
	HSPA1A
	SKP1
	CRK
	TNFRSF21
	PPP1CA
	SMAD1
	ATF2
	CDKN2A
	EXO1
	PLAU
	RELA
	ACTB
	ID2
	ARRB2
	PPP3CA
	PDE6D
	IGF1R
	THRB
	HSP90AB1
	F13A1
	TBXA2R
	PAK2
	IL15
	TNFRSF1A
	PCNA
	DOCK1
	IL13
	NFKBIA
	CDKN1A
	ARNT
	BCL2
	ZFYVE9
	PDPK1
	PRNP
	CCND3
	CALM1
	OPRM1
	RARA
	EIF4E2
	TGFA
	CDC42
	CDKN1B
	NKX3-1
	DLAT
	RAC1
	PTPN11
	PAK1
	C3
	GNB1
	HDAC1
	GNA12
	TGFBR1
	WASF1
	STAT3
	CDK6
	BIRC2
	CSNK1E
	CACNA1I
	MSH3
	PRKAA1
	PGM1
	PML
	NME2
	STK11
	XIAP
	ACTN1
	SRF
	ARHGAP35
	CREB3
	RHOA
	CDC25B
	EIF4E
	ADRB1
	PTEN
	CSF3
	MAPKAPK5
	RBL1
	PPP2R1A
	CSNK2B
	F2
	IL2
	RALB
	MAPK7
	IL1A
	TNFRSF14
	SMAD5
	MAP3K7
	NR4A1
	RAD51
	ID1
	PPP1R12A
	CACNA1C
	CBLB
	BMPR2
	SP1
	CSF2
	MAP4K1
	CBL
	RAP1A
	VEGFA
	CSF1
	TNFRSF9
	MTOR
	BCAR1
	IL7
	TNFRSF1B
	PIM1
	SSTR2
	RASSF5
	HIF1A
	GLI3
	BRCA2
	WAS
	TNFSF12
	FGF12
	DDIT3
	LRP6
	VHL
	GNB3
	MPL
	ACVR2A
	VASP
	TFDP1
	WASL
	CAB39
	DVL3
	SSTR1
	GNG3
	A2M
	PGF
	IL12A
	CFTR
	E2F4
	MITF
	CCNE1
	BDNF
	GRIK2
	PRKCB
	RALBP1
	DCC
	ADORA2A
	F8
	ADA
	ABCC2
	GRM3
	IGF1
	TAB2
	ARRB1
	SLC2A1
	ALDH7A1
	PTPN1
	ITPR3
	CTNNA1
	ZYX
	MAP4K4
	CD28
	BIRC5
	DLD
	RPA1
	GLI2
	MAPK10
	SCNN1G
	E2F5
	PTH1R
	CASP3
	RAC3
	IL10
	CCND2
	GAPDH
	RASA1
	TPR
	EPAS1
	PRKACA
	CFB
	SMAD6
	MKNK2
	BIRC3
	RUNX1
	RPS6KB1
	TSC1
	EIF4EBP1
	ACVR1B
	RALA
	SHC1
	BTRC
	FSHR
	CCKBR
	IL1R1
	RPS6KB2
	IKBKB
	LAMTOR3
	CCR5
	ROCK1
	HLA-DRA
	FGF1
	LTBR
	IL5
	PDE2A
	LEP
	TNFSF13B
	AMHR2
	IQGAP1
	MAPK11
	CSF3R
	FLNB
	NME1
	TCF7L2
	GRM2
	CHUK
	GCK
	STAT1
	HDAC2
	C1R
	PAX8
	PDE3B
	TAB1
	IL1RAP
	JUND
	SMURF1
	ULK1
	ALDOA
	GRIA2
	EIF4B
	EDNRA
	PPP5C
	ACTN2
	GCDH
	NTF4
	CYP2E1
	CEBPA
	MAPK9
	MKNK1
	CBLC
	RBX1
	DVL2
	DIAPH1
	ACVRL1
	POLA1
	TNFRSF10A
	DRD4
	AGTR1
	RUVBL1
	TAP1
	PPP2R5D
	RPS6KA5
	LHCGR
	ACTG1
	PROC
	SORBS1
	ABCD2
	PDE4D
	VCL
	PPARD
	CXCR4
	NOTCH1
	MOS
	IFNAR1
	GRM7
	GRIK3
	FGF8
	GRIK1
	CAPN2
	LEPR
	IFNG
	AGTR2
	SUV39H1
	GRIN2D
	PRL
	PPP1CB
	CUL1
	HLA-DMA
	TNFRSF25
	HK2
	CRKL
	IL10RB
	PDHA1
	SUV39H2
	CX3CR1
	F2R
	MAP3K3
	ADRB2
	MAP3K8
	MLST8
	CD27
	TGFB2
	CGA
	AVPR2
	TSC2
	KCNB1
	RASSF1
	CXCL12
	ADH6
	DRD1
	ECSIT
	F3
	MECOM
	ABCD1
	YES1
	GRID2
	JUP
	RAPGEF1
	COL11A2
	POLR3G
	THRA
	MAPT
	ABCA1
	IL4
	ZFYVE16
	FGF13
	CAV1
	DUSP5
	PXN
	IL6ST
	TNFRSF17
	GABRB2
	PLD1
	MIF
	RBL2
	PTPRF
	HSPB1
	ALDH2
	FGF3
	ACVR2B
	NFATC1
	POLD1
	CD14
	STAT5B
	TSHR
	BDKRB2
	SCNN1A
	IFNAR2
	HSPA5
	F2RL1
	MAP3K1
	IL17A
	TNFRSF18
	CTNND1
	IL1B
	CD80
	INHBA
	DUSP9
	HGF
	IFNA2
	CCR3
	GLI1
	MAP3K4
	TLN1
	HTR2C
	PRKCA
	APPL1
	IL13RA1
	NFATC3
	NFATC4
	GABRB3
	CACNA1B
	HTR2B
	EGR1
	WASF2
	NPY1R
	C8A
	ABCB1
	RPS6KA1
	RAP1B
	OPRD1
	STAT5A
	GIPR
	PPP2R5B
	TNFSF4
	C1QA
	IL4R
	GRM1
	MGST1
	CSNK1A1
	PPP2R1B
	GRM5
	CD86
	RPA3
	MAP3K12
	PPP3R1
	MAP3K2
	BMPR1B
	S1PR1
	FGF10
	PTGER4
	PLCB1
	ACVR1
	CCR1
	EPO
	SERPINA1
	PCK1
	TNFSF14
	SERPINC1
	CCR7
	PFKL
	MYL2
	PTPRM
	MAPK12
	PRKX
	MAP3K11
	CAT
	INS
	PITX2
	CAMK2G
	CALCRL
	ACADVL
	BAIAP2
	PAK3
	ADRA1B
	GRIA1
	IL6R
	HSP90B1
	ADRA2A
	GRIN2B
	APRT
	SNAI1
	GUCY2C
	OPRK1
	HLA-DQA1
	IFNGR1
	PDHB
	DUSP7
	HLA-DOA
	SSTR3
	CXCR2
	AANAT
	C5
	ADORA1
	NFATC2
	P2RY1
	SUFU
	PLOD3
	IL11
	AKR1C3
	CDKN2B
	CNTFR
	OGDH
	TFG
	TDO2
	ABCC9
	SMAD9
	COMT
	CTNNBIP1
	NME5
	DKK1
	HPRT1
	PIM2
	FZD7
	MTHFS
	CHRNG
	CTSG
	GSTP1
	CXCL5
	GLP1R
	P2RX4
	NMUR2
	CXCL16
	CHRD
	SHC3
	EHHADH
	HSPA2
	FBP1
	PDE6G
	P2RY6
	GSTA2
	TNFRSF13B
	GSTK1
	IFNA4
	DAAM2
	SHMT1
	CXCL9
	PRPS1
	CAB39L
	GSTM5
	GSTM4
	SNAI2
	CCL28
	AKR1C1
	PDE6H
	CXCL14
	IL23A
	CTF1
	PPP3CC
	NTF3
	PARVG
	SENP2
	P2RX7
	WIF1
	PLCB4
	EGLN3
	ACSS1
	IL23R
	SHMT2
	INMT
	VEGFB
	CPT1B
	CXCL11
	HARS2
	CACNA1S
	STMN1
	YARS2
	SETDB2
	TNXB
	CDA
	RDH12
	CYP1A1
	CCL4
	ADCY4
	MYLK
	PTH2R
	CCL7
	RRAS2
	AXIN1
	CXCR3
	SERPING1
	CES1
	RHEB
	CREB3L1
	CALM3
	ROCK2
	TNFRSF10D
	PARVA
	STK36
	RFC1
	POLE
	POLD3
	HADHA
	ENO3
	ABCD3
	ACAT1
	DLST
	TYMS
	KYNU
	ABCB8
	PFAS
	ABCC1
	PGK1
	CD55
	CACYBP
	ABCB6
	ABCB10
	CPT1A
	RPS6KA6
	ACAA2
	HADHB
	FARSB
	ABCB7
	GSTO1
	IMPDH2
	GPI
	ACAA1
	PLAUR
	MGST3
	FH
	MTR
	ACSL3
	ALDH1B1
	PNP
	FZD1
	PNPT1
	ADSL
	PAPSS1
	FRAT1
	CHD8
	SMURF2
	TAOK2
	SOX17
	RAPGEF2
	PPP3CB
	PPP2CB
	SETD2
	CXXC4
	FBXW11
	SMO
	WNT9B
	WNT4
	WNT2
	TNFSF11
	TNFRSF10B
	THBS3
	TAT
	RPTOR
	RDH5
	RDH11
	PTPRR
	PTGFR
	PTCH1
	PPM1A
	PPAT
	PIPOX
	PAK4
	P2RX6
	OSM
	NKD2
	NAT2
	NAT1
	MYLK2
	MMP7
	MAPKAPK3
	MAPK13
	LRAT
	KLK3
	KITLG
	IL20RB
	IL12RB1
	IFNA8
	IFNA5
	IFNA14
	ICOS
	HLA-DPB1
	HLA-DPA1
	HLA-DMB
	GSTM3
	GSTM2
	GSTA1
	GPR35
	GLRA2
	F12
	EDA2R
	EDA
	ECHS1
	CYP2C18
	CHRNB3
	CHRNA9
	CFI
	CER1
	CCL23
	CANT1
	C4BPB
	C1QB
	ALDH3A2
	AKR1C4
	AKR1C2
	AKR1A1
	AK4
	ADORA3
	ADH1C
	ACADL
	GOT1
	PLOD2
	PAPSS2
	PDE3A
	GDA
	RPS6KA3
	TYMP
	PLOD1
	MC1R
	CCL18
	ULK2
	ABCD4
	DDIT4
	GABBR2
	ADH5
	CXCL13
	F10
	GOT2
	SERPINA5
	UMPS
	CHRNB1
	FLT3LG
	LMO7
	PLA2G10
	PLA2G2A
	MAPK8IP2
	CCL21
	CAV2
	FZD4
	MAP3K14
	MAP4K2
	ACADM
	TBL1X
	GSTO2
	LIG1
	AASS
	ECI1
	GALM
	HADH
	ABCC3
	CPT2
	GSTZ1
	PGM2
	EPHX1
	ACADS
	ABCB9
	ACSS2
	ABCA13
	MAPKAPK2
	RPS6KA4
	CAMK2D
	NLK
	CAMK2B
	MAP4K3
	PRKCG
	IFNA21
	UGT1A9
	THBS2
	CYP3A5
	CYP2C9
	RELB
	WNT5A
	LEFTY1
	IFNA1
	GDF5
	AOC3
	IL1R2
	WNT7A
	TSHB
	DKK4
	CHRM3
	SHC4
	TNFSF8
	P2RX1
	CCL22
	CAV3
	VIPR2
	FZD10
	C1S
	DPYS
	CD70
	IFNW1
	PRKACG
	KMO
	ARNT2
	IL18RAP
	TPH1
	PRSS2
	S1PR2
	CCR2
	APLNR
	GSTT1
	C3AR1
	F9
	C6
	FPR2
	IL17RB
	PTGIR
	C2
	IFNB1
	CHRND
	PDGFD
	IL17RA
	KLKB1
	IFNA10
	C9
	MAS1
	ALDH3A1
	TNFRSF19
	TACR1
	P2RX2
	NPY2R
	CHRNA3
	GRPR
	CYP1A2
	CYP2B6
	CHRM4
	XCL1
	P2RX5
	ICOSLG
	VIPR1
	AOC2
	WNT16
	CCL5
	S1PR4
	FGF9
	EDNRB
	DCT
	BMP5
	C8G
	ABCG8
	GLRA3
	CFH
	RASGRP4
	SERPIND1
	F7
	F11
	CCL25
	SETMAR
	ABCB5
	RPE65
	VANGL2
	WNT1
	NODAL
	IL21
	IL18
	FMO2
	TFPI
	RICTOR
	IL7R
	HTR1A
	CHRM1
	CACNA1H
	CXCR1
	CXCR5
	PLAT
	PLCG2
	ABCC8
	FGF4
	FGF17
	FGF18
	MBL2
	ADCY5
	CHRM2
	ADRA1A
	PTAFR
	BDKRB1
	CNR2
	DUSP3
	ENTPD5
	PLG
	FZD3
	RASGRF1
	PTPRJ
	CXCL1
	HTR2A
	NMBR
	CCKAR
	IL2RA
	HCRTR1
	CACNA1E
	TAOK1
	TCF7
	TAOK3
	HSPA1B
	LTB
	RRAS
	PRLR
	TSLP
	SHH
	GSTM1
	FRAT2
	STRADA
	PROS1
	C4BPA
	SETD7
	CCL2
	CCL8
	PF4
	CD40LG
	EHMT1
	FGF16
	CCL26
	SPI1
	CYP3A4
	PDGFC
	CXCL10
	TNFSF13
	PLA2G1B
	IL3
	IFNGR2
	PDE8A
	IFNA17
	PLA2G6
	F2RL3
	DUSP4
	PIGR
	WNT10A
	WNT9A
	WNT3
	WNT5B
	WNT8B
	FGF11
	FGF14
	CLCF1
	HLA-DQB1
	HLA-DQA2
	TNFRSF11A
	RASGRP1
	CR2
	BMP6
	NCAM1
	CHRNA1
	LRP5
	FZD6
	PORCN
	TYR
	EGLN1
	EGLN2
	LIF
	GABRB1
	ADCY6
	IL24
	LHB
	ENTPD1
	CD46
	ASH1L
	WNT8A
	WNT6
	WNT2B
	WNT7B
	IL26
	GLRB
	FPR1
	SHC2
	CCL20
	CCL11
	CCL19
	CCL13
	NOG
	PARD3
	APC2
	CCL3
	CCL16
	ADCY1
	LPAR3
	NPR1
	PPBP
	CCR6
	IL20
	INHBB
	CCR10
	CCL27
	CCR4
	CCL17
	CHRNA4
	ADCY2
	FGF5
	CXCL2
	CXCL6
	IL18R1
	CCL1
	MASP2
	TAP2
	GAB2
	CR1
	CCL24
	CCL15
	IL19
	PRSS1
	ABCC4
	NPR2
	IL9
	GCGR
	PTGER2
	ADRB3
	ACVR1C
	PLA2G5
	C5AR1
	FSHB
	GALR2
	GHRHR
	MC4R
	C4A
	GRM6
	IL17B
	CREB3L2
	AMH
	GUCY2D
	F2RL2
	FGF19
	PDHA2
	FGF23
	XDH
	F5
	CD59
	CACNA1F
	C1QC
	CYSLTR2
	DBH
	SERPINF2
	CFD
	CHRNB4
	MASP1
	ADRA2B
	CHRNB2
	CHRNA5
	ABCG1
	P2RX3
	GUCY2F
	ABCA4
	FMO3
	FMO1
	NPFFR2
	MAOB
	TRPM5
	ABCB11
	ADCYAP1R1
	MGST2
	FGF21
	CRHR2
	TNFSF18
	RDH10
	GNG13
	PRICKLE1
	NKD1
	PNMT
	PKLR
	GLRA1
	IFNA16
	VEGFC
	DKK2
	CACNB2
	GALR1
	DRD5
	GSTA4
	ABCG4
	XCR1
	EIF4E1B
	THBD
	NPBWR1
	ADRA2C
	TNFSF15
	POLD4
	TNFRSF4
	CX3CL1
	HHIP
	GPR50
	CRHR1
	PRSS3
	CHP2
	TNFRSF13C
	GRIN2C
	HLA-DOB
	CALML5
	CACNA2D3
	ABCC10
	PDE6A
	TNN
	ABCA7
	LIFR
	ABCC5
	ABCA2
	C4B
	FZD2
	ABCA3
	TNFSF9
	CACNA2D2
	THBS4
	BMP8B
	ADCY9
	MTHFR
	ENPP1
	ADCY3
	IFNA6
	GSTA5
	GSTA3
	GMPR
	ADH1B
	GRIK5
	IDO1
	PDE1B
	CHRNA6
	HRH1
	AICDA
	PDE4B
	CHRNA7
	LTB4R
	LTB4R2
	CYP3A7
	CYP2C19
	GUCY1A2
	CYP2A13
	IFNA7
	LEFTY2
	CES2
	GABRA5
	DHRS3
	ID4
	UGT2B15
	MTFMT
	ADH7
	AADAT
	NME6
	ALDH1A1
	FZD5
	FGF20
	TCF7L1
	FPR3
	SCTR
	AVPR1A
	GABRR2
	P2RY2
	CALCR
	ADCY7
	CXCR6
	ADH1A
	ADH4
	EDAR
	CACNA1D
	GALR3
	CHRNE
	CCR8
	MTNR1B
	P2RY4
	F13B
	GDF6
	CCR9
	NTSR2
	NMUR1
	GHSR
	GLP2R
	NPFFR1
	NPY5R
	SSTR4
	MC3R
	PRLHR
	MC5R
	MC2R
	HCRTR2
	OXTR
	GRIK4
	MCHR1
	TACR3
	GDF7
	CPB2
	C7
	ABCG5
	CYSLTR1
	C8B
	AMT
	P2RY13
	SRD5A2
	UGT2B11
